# Supplementary material
Source: MDPI journal article supplement (https://www.mdpi.com/1424-2818/15/11/1145)
Supplement: s1 [file s1]

Archive with 2 entries (2 files):
- Roberts_et_al_SI_Diversity_Nov14.pdf
- SI_Detailed_Results.pdf
